# Supplementary material
Source: PubMed Central journal article supplement (PMC5838615)
Supplement: jamaneurol-75-236-s001.pdf [file jamaneurol-75-236-s001.pdf]

## Supplementary Online Content

Bertrand A, Wen J, Rinaldi D, et al; the Predict to Prevent Frontotemporal Lobar Degeneration and Amyotrophic Lateral Sclerosis (PREV-DEMALS) Study Group. Early cognitive, structural, and microstructural changes in *C9orf72* presymptomatic carriers younger than 40 years. *JAMA Neurol*. Published online December 2, 2017.  
doi:10.1001/jamaneurol.2017.4266

**eMethods 1.** Neuropsychological and behavioral tests

**eMethods 2.** Magnetic resonance imaging sequence parameters

**eFigure 1.** Correlation between age and expected years to onset

**eFigure 2.** Diffusion tensor magnetic resonance imaging metrics

**eTable 1.** Effect of *C9orf72* mutation on volume of cortical regions of interest

**eTable 2.** Effect of *C9orf72* mutation on volume of subcortical structures

**eTable 3.** Effect of *C9orf72* mutation on diffusion tensor magnetic resonance imaging metrics

**eReferences.**

This supplementary material has been provided by the authors to give readers additional information about their work.

## **eMethods 1.** Neuropsychological and behavioral tests

All the participants underwent a comprehensive neuropsychological and behavioral evaluation, based on internationally validated scales. Behavioral disorders were assessed using the Frontal Behavioural Inventory (FBI), the Neuropsychiatric Inventory (NPI), the Frontal Behavioural scale, the Frontotemporal dementia Rating Scale (FRS), the CBI-R and Starskein apathy scale. Functional disability was assessed using the Frontal CDR and DAD scale (Disability Assessment for Dementia). Depression and anxiety were assessed using the STAI and BDI-II scale. All the participants also underwent a detailed neuropsychological battery evaluating global cognitive efficiency (Mini Mental State Examination (MMSE)<sup>1</sup>, MATTIS dementia rating scale (MDRS<sup>2</sup>); executive functions (Frontal Assessment battery<sup>3</sup>); social cognition and theory of mind (Social Emotion Assessment<sup>4</sup>); episodic memory (Free and cued recall test); language (verbal fluencies, Boston Naming test) visuospatial processing (Benson figure copy) and gestural praxis. Gestural praxis were assessed with a shortened version of the Batterie d'Evaluation des Praxies<sup>5</sup> with 5 testing conditions: (a) manual dexterity, using imitation of finger configuration, (b) melokinetic apraxia, using motor programming and alternate gestures, (c) imitation of non-representational gestures, (d) pantomime of intransitive gestures, (e) pantomime of transitive gestures.

## **eMethods 2.** Magnetic resonance imaging sequence parameters

Parameters of 3DT1 sequence were as follow: spatial resolution = (1.1x1.1x1.1) mm<sup>3</sup>; TE/TR = 2.8-3ms/minimum; Bandwidth: 240-255 Hz. The 64 subjects imaged on a Siemens MR also underwent DTI with the following parameters: spatial resolution = (2x2x2.5) mm<sup>3</sup>; TE/TR = 90/7300ms; Bandwidth = 1580 Hz. Each DTI scan comprised 64 directions diffusion-weighted images (b value = 1000 s/mm<sup>2</sup>), 9 T2-weighted images (b value = 0 s/mm<sup>2</sup>) and a B0 field map.

**eFigure 1.** Correlation between age and expected years to onset

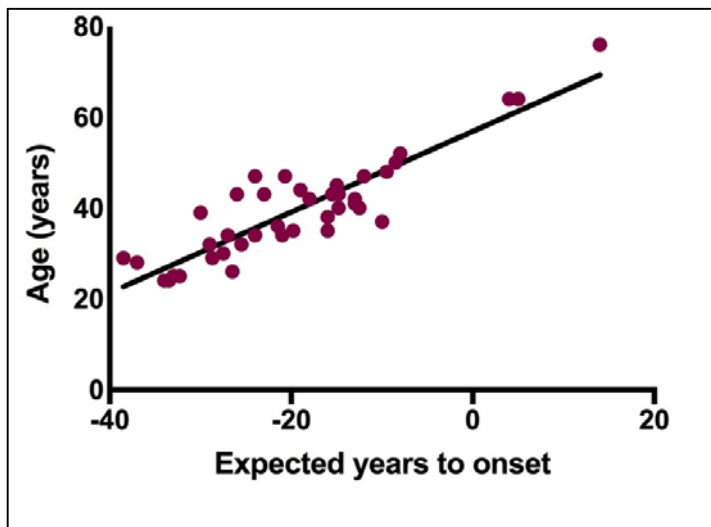

In c9+ subjects, real age and expected years to onset (based on the mean familial age at onset) showed strong correlation with high shared variance (Pearson correlation coefficient,  $p < 0.0001$ ;  $r^2 = 0.802$ ).

**Figure 2.** Diffusion tensor magnetic resonance imaging metrics

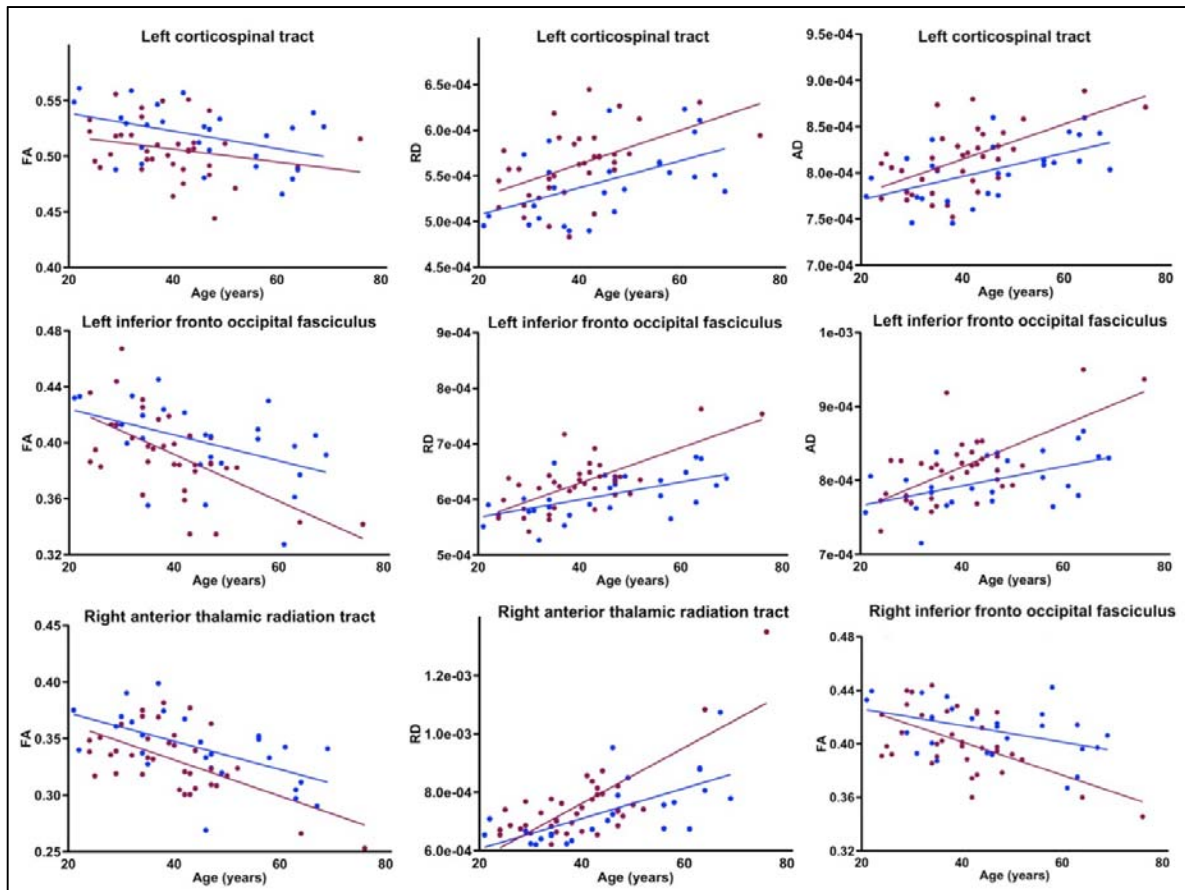

Graphs of DTI metrics as a function of age in c9+ and c9- subjects. The exact position of x-values (age) is not provided, in order to prevent individual subjects from identifying their mutation status.

**eTable 1.** Effect of *C9orf72* mutation on volume of cortical regions of interest

|                                    | <b>c9orf72 mutation</b> |                 |               |
|------------------------------------|-------------------------|-----------------|---------------|
|                                    | Coefficient             | Uncorr. p value | Corr. p value |
| <i>Frontal lobe</i>                |                         |                 |               |
| Left frontal pole                  | -76.8                   | 0.016*          | 0.100         |
| Left medial orbitofrontal          | -199.8                  | 0.096           | 0.211         |
| Left lateral orbitofrontal         | -185.1                  | 0.113           | 0.240         |
| Left pars orbitalis                | -20.7                   | 0.771           | 0.832         |
| Left pars triangularis             | -178.5                  | 0.141           | 0.254         |
| Left pars opercularis              | -339.6                  | 0.038*          | 0.155         |
| Left rostral middle frontal        | -208.3                  | 0.536           | 0.675         |
| Left caudal middle frontal         | -381.2                  | 0.039*          | 0.155         |
| Left superior frontal              | -1062.6                 | 0.007*          | 0.053         |
| Left precentral                    | -578.0                  | 0.073           | 0.178         |
| Right frontal pole                 | -28.1                   | 0.502           | 0.649         |
| Right medial orbitofrontal         | -0.1                    | 1.000           | 1.000         |
| Right lateral orbitofrontal        | -182.2                  | 0.190           | 0.308         |
| Right pars orbitalis               | -138.5                  | 0.058           | 0.155         |
| Right pars triangularis            | -109.8                  | 0.394           | 0.558         |
| Right pars opercularis             | -278.4                  | 0.066           | 0.166         |
| Right rostral middle frontal       | -635.8                  | 0.053           | 0.155         |
| <b>Right caudal middle frontal</b> | -490.1                  | 0.005*          | 0.046*        |
| Right superior frontal             | -736.1                  | 0.054           | 0.155         |
| Right precentral                   | -476.9                  | 0.086           | 0.201         |
| <i>Temporal lobe</i>               |                         |                 |               |
| Left temporal pole                 | -212.6                  | 0.015*          | 0.100         |
| Left banks sts                     | -54.6                   | 0.572           | 0.695         |
| Left transverse temporal           | -74.3                   | 0.116           | 0.240         |
| Left superior temporal             | -372.3                  | 0.177           | 0.294         |
| Left middle temporal               | -78.1                   | 0.771           | 0.832         |
| <b>Left inferior temporal</b>      | -1155.7                 | <0.001*         | 0.005*        |
| Left fusiform                      | -502.2                  | 0.033*          | 0.155         |
| Left entorhinal                    | -107.0                  | 0.135           | 0.254         |
| Left parahippocampal               | -51.1                   | 0.485           | 0.649         |
| Right temporal pole                | -111.4                  | 0.157           | 0.274         |
| Right banks sts                    | -2.0                    | 0.980           | 0.994         |
| Right transverse temporal          | -15.3                   | 0.694           | 0.800         |
| Right superior temporal            | -376.5                  | 0.142           | 0.254         |
| Right middle temporal              | -178.0                  | 0.547           | 0.676         |
| <b>Right inferior temporal</b>     | -924.3                  | 0.002*          | 0.018*        |
| <b>Right fusiform</b>              | -833.8                  | <0.001*         | 0.008*        |
| Right entorhinal                   | -48.6                   | 0.506           | 0.649         |
| Right parahippocampal              | -115.9                  | 0.059           | 0.155         |
| <i>Parietal lobe</i>               |                         |                 |               |
| Left postcentral                   | -377.6                  | 0.094           | 0.211         |
| Left superior parietal             | -692.9                  | 0.045*          | 0.155         |
| Left inferior parietal             | -674.2                  | 0.030*          | 0.155         |
| <b>Left precuneus</b>              | -711.3                  | <0.001*         | 0.008*        |
| <b>Left supramarginal</b>          | -972.2                  | <0.001*         | 0.008*        |
| Left paracentral                   | -17.3                   | 0.855           | 0.899         |
| Right postcentral                  | -344.6                  | 0.126           | 0.245         |
| <b>Right superior parietal</b>     | -854.9                  | 0.005*          | 0.046*        |
| Right inferior parietal            | -649.2                  | 0.058           | 0.155         |
| <b>Right precuneus</b>             | -677.8                  | 0.002*          | 0.018*        |
| Right supramarginal                | -308.8                  | 0.232           | 0.358         |
| Right paracentral                  | -37.5                   | 0.717           | 0.812         |
| <i>Occipital lobe</i>              |                         |                 |               |
| Left lingual                       | -380.1                  | 0.051           | 0.155         |
| Left lateral occipital             | -695.0                  | 0.019*          | 0.107         |
| Left cuneus                        | -137.2                  | 0.051           | 0.155         |

|                                  |        |       |       |
|----------------------------------|--------|-------|-------|
| Left pericalcarine               | 76.2   | 0.213 | 0.336 |
| Right lingual                    | -132.0 | 0.501 | 0.649 |
| Right lateral occipital          | -590.6 | 0.051 | 0.155 |
| Right cuneus                     | -117.5 | 0.163 | 0.277 |
| Right pericalcarine              | 111.1  | 0.122 | 0.245 |
| <i>Cingulate gyrus</i>           |        |       |       |
| Left rostral anterior cingulate  | -74.8  | 0.349 | 0.505 |
| Left caudal anterior cingulate   | -38.2  | 0.728 | 0.812 |
| Left isthmus cingulate           | -142.3 | 0.059 | 0.155 |
| Left posterior cingulate         | -13.7  | 0.890 | 0.917 |
| Right rostral anterior cingulate | -93.2  | 0.265 | 0.400 |
| Right caudal anterior cingulate  | 18.5   | 0.859 | 0.899 |
| Right isthmus cingulate          | -32.6  | 0.670 | 0.785 |
| Right posterior cingulate        | 42.8   | 0.589 | 0.702 |
| <i>Insula</i>                    |        |       |       |
| Left insula                      | -111.3 | 0.320 | 0.473 |
| Right insula                     | -96.1  | 0.441 | 0.613 |

Effect of *c9orf72* mutation on volume of cortical ROI, with age and sex as covariates.  
 Uncorr.: uncorrected for multiple comparison; Corr.: corrected for multiple comparisons.  
 Cortical ROI showing significant p-value after correction are shown in bold.

**eTable 2.** Effect of *C9orf72* mutation on volume of subcortical structures

|                            | <b>c9orf72 mutation</b> |                 |               |
|----------------------------|-------------------------|-----------------|---------------|
|                            | Coefficient             | Uncorr. p value | Corr. p value |
| Left cerebellum cortex     | -1043.4                 | 0.385           | 0.629         |
| Right cerebellum cortex    | -687.2                  | 0.570           | 0.790         |
| Left ventral diencephalon  | -31.3                   | 0.704           | 0.810         |
| Right ventral diencephalon | -7.8                    | 0.915           | 0.935         |
| Left putamen               | -141.9                  | 0.302           | 0.556         |
| Right putamen              | -176.0                  | 0.176           | 0.420         |
| Left pallidum              | -84.6                   | 0.065           | 0.342         |
| Right pallidum             | -57.1                   | 0.186           | 0.420         |
| Left caudate               | -25.8                   | 0.720           | 0.810         |
| Right caudate              | -6.6                    | 0.935           | 0.935         |
| Left accumbens area        | -18.5                   | 0.480           | 0.720         |
| Right accumbens area       | -24.5                   | 0.309           | 0.556         |
| Left amygdala              | -20.2                   | 0.659           | 0.810         |
| Right amygdala             | -71.1                   | 0.151           | 0.420         |
| Left thalamus proper       | -383.0                  | 0.022*          | 0.202         |
| Right thalamus proper      | -444.1                  | 0.001*          | 0.010*        |
| Left hippocampus           | -161.6                  | 0.100           | 0.360         |
| Right hippocampus          | -175.6                  | 0.076           | 0.342         |

Effect of *c9orf72* mutation on volume of subcortical structures, with age and sex as covariates. Uncorr.: uncorrected for multiple comparison; Corr.: corrected for multiple comparisons. Subcortical ROI showing significant p-value after correction is shown in bold.



**eTable 3.** Effect of *C9orf72* mutation on diffusion tensor magnetic resonance imaging metrics

|                                                | FA           |                 |               | MD                         |                 |               | RD                         |                 |               | AD                         |                 |               |
|------------------------------------------------|--------------|-----------------|---------------|----------------------------|-----------------|---------------|----------------------------|-----------------|---------------|----------------------------|-----------------|---------------|
|                                                | Coeff. (x10) | Uncorr. p value | Corr. p value | Coeff. (x10 <sup>3</sup> ) | Uncorr. p value | Corr. p value | Coeff. (x10 <sup>4</sup> ) | Uncorr. p value | Corr. p value | Coeff. (x10 <sup>4</sup> ) | Uncorr. p value | Corr. p value |
| L. anterior thalamic radiation                 | -0.120       | 0.035*          | 0.099         | 0.026                      | 0.163           | 0.326         | 0.358                      | 0.062           | 0.113         | 0.326                      | 0.083           | 0.122         |
| <b>R. anterior thalamic radiation</b>          | -0.180       | 0.004*          | 0.049*        | 0.044                      | 0.037*          | 0.229         | 0.596                      | 0.011*          | 0.041*        | 0.546                      | 0.015*          | 0.055         |
| <b>L. corticospinal tract</b>                  | -0.165       | 0.008*          | 0.049*        | 0.006                      | 0.531           | 0.758         | 0.279                      | 0.002*          | 0.015*        | 0.209                      | 0.004*          | 0.022*        |
| R. corticospinal tract                         | -0.098       | 0.120           | 0.239         | 0.002                      | 0.865           | 0.911         | 0.178                      | 0.045*          | 0.099         | 0.124                      | 0.086           | 0.122         |
| L. cingulum cingulate gyrus                    | -0.230       | 0.105           | 0.239         | 0.022                      | 0.334           | 0.542         | 0.506                      | 0.053           | 0.105         | 0.410                      | 0.065           | 0.119         |
| R. cingulum cingulate gyrus                    | -0.171       | 0.246           | 0.378         | -0.010                     | 0.722           | 0.861         | 0.220                      | 0.418           | 0.517         | 0.121                      | 0.616           | 0.648         |
| L. cingulum hippocampus                        | 0.018        | 0.867           | 0.867         | 0.057                      | 0.103           | 0.229         | 0.244                      | 0.439           | 0.517         | 0.360                      | 0.249           | 0.312         |
| R. cingulum hippocampus                        | 0.096        | 0.435           | 0.622         | 0.012                      | 0.732           | 0.861         | -0.024                     | 0.970           | 0.970         | 0.024                      | 0.924           | 0.924         |
| Forceps major                                  | -0.146       | 0.109           | 0.239         | 0.008                      | 0.790           | 0.877         | 0.300                      | 0.158           | 0.226         | 0.226                      | 0.302           | 0.355         |
| <b>Forceps minor</b>                           | -0.169       | 0.016*          | 0.052         | 0.001                      | 0.958           | 0.958         | 0.277                      | 0.016*          | 0.045*        | 0.187                      | 0.067           | 0.119         |
| <b>L. inferior fronto occipital fasciculus</b> | -0.163       | 0.010*          | 0.049*        | 0.023                      | 0.077           | 0.229         | 0.334                      | <0.001*         | 0.008*        | 0.290                      | 0.002*          | 0.015*        |
| <b>R. inferior fronto occipital fasciculus</b> | -0.129       | 0.009*          | 0.049*        | 0.012                      | 0.352           | 0.542         | 0.225                      | 0.025*          | 0.062         | 0.189                      | 0.058           | 0.119         |
| <b>L. inferior longitudinal fasciculus</b>     | -0.038       | 0.582           | 0.670         | 0.037                      | 0.001*          | 0.027*        | 0.285                      | 0.006*          | 0.040*        | 0.311                      | 0.001*          | 0.015*        |
| <b>R. inferior longitudinal fasciculus</b>     | -0.081       | 0.235           | 0.378         | 0.041                      | 0.005*          | 0.055         | 0.267                      | 0.009*          | 0.041*        | 0.314                      | 0.002*          | 0.015*        |
| L. superior longitudinal fasciculus            | -0.064       | 0.146           | 0.265         | 0.018                      | 0.046*          | 0.229         | 0.159                      | 0.080           | 0.133         | 0.167                      | 0.053           | 0.119         |
| <b>R. superior longitudinal fasciculus</b>     | -0.136       | 0.015*          | 0.052         | 0.018                      | 0.103           | 0.229         | 0.279                      | 0.012*          | 0.041*        | 0.244                      | 0.018*          | 0.055         |
| L. uncinate fasciculus                         | -0.065       | 0.489           | 0.652         | 0.011                      | 0.591           | 0.788         | 0.190                      | 0.302           | 0.402         | 0.165                      | 0.348           | 0.386         |
| R. uncinate fasciculus                         | -0.030       | 0.800           | 0.842         | -0.032                     | 0.082           | 0.229         | -0.116                     | 0.503           | 0.559         | -0.182                     | 0.195           | 0.260         |
| L. superior longitudinal fasciculus temporal   | 0.072        | 0.593           | 0.670         | 0.025                      | 0.193           | 0.350         | 0.047                      | 0.743           | 0.782         | 0.155                      | 0.072           | 0.119         |
| R. superior longitudinal fasciculus temporal   | -0.062       | 0.603           | 0.670         | 0.034                      | 0.088           | 0.229         | 0.174                      | 0.109           | 0.168         | 0.232                      | 0.019*          | 0.055         |

Effect of *c9orf72* mutation on DTI metrics, with age and sex as covariates. Uncorr.: uncorrected for multiple comparison; Corr.: corrected for multiple comparisons. L.: left; R.: right. Tract with at least one DTI metric showing significant p-value after correction are shown in bold.

## eReferences.

1. Folstein MF, Folstein SE, McHugh PR. "Mini-mental state". A practical method for grading the cognitive state of patients for the clinician. *J Psychiatr Res.* 1975;12(3):189-198.
2. Mattis S. Mental status examination for organic mental syndrome in the elderly patients. In: *Geriatrics Psychiatry: A Handbook for Psychiatrists and Primary Care Physicians.* New York: Grune & Stratton; 1976:77-121.
3. Dubois B, Slachevsky A, Litvan I, Pillon B. The FAB: a Frontal Assessment Battery at bedside. *Neurology.* 2000;55(11):1621-1626.
4. Funkiewiez A, Bertoux M, de Souza LC, Lévy R, Dubois B. The SEA (Social cognition and Emotional Assessment): a clinical neuropsychological tool for early diagnosis of frontal variant of frontotemporal lobar degeneration. *Neuropsychology.* 2012;26(1):81-90. doi:10.1037/a0025318.
5. Peigneux P, Van Der Linden M. Présentation d'une batterie neuropsychologique et cognitive pour l'évaluation de l'apraxie gestuelle. *Rev Neuropsychol.* 2000;10(2):311-362.
